# Supplementary material for: Luminescent properties of milk carbon dots and their sulphur and nitrogen doped analogues
Source: Royal Society of Chemistry journal article supplement (doi:10.1039/c4ra11158c), 2014-01-01
Supplement: c4ra11158c1.pdf [file c4ra11158c1.pdf]

## Supporting Information

Photophysical properties of Milk Carbon dots and their Sulphur and Nitrogen doped Analogues

*Dan Wang, Xudong Wang, Yali Guo, Weisheng Liu, Wenwu Qin*

[Sep 25, 2014]

*Key Laboratory of Nonferrous Metal Chemistry and Resources Utilization of Gansu Province and State Key Laboratory of Applied Organic Chemistry, College of Chemistry and Chemical Engineering, Lanzhou University, Lanzhou 730000, P. R. China.*

Figure S1 ↓ AFM images of (a) Milk-CDs (b) S doped CDs and (c) N doped CDs.

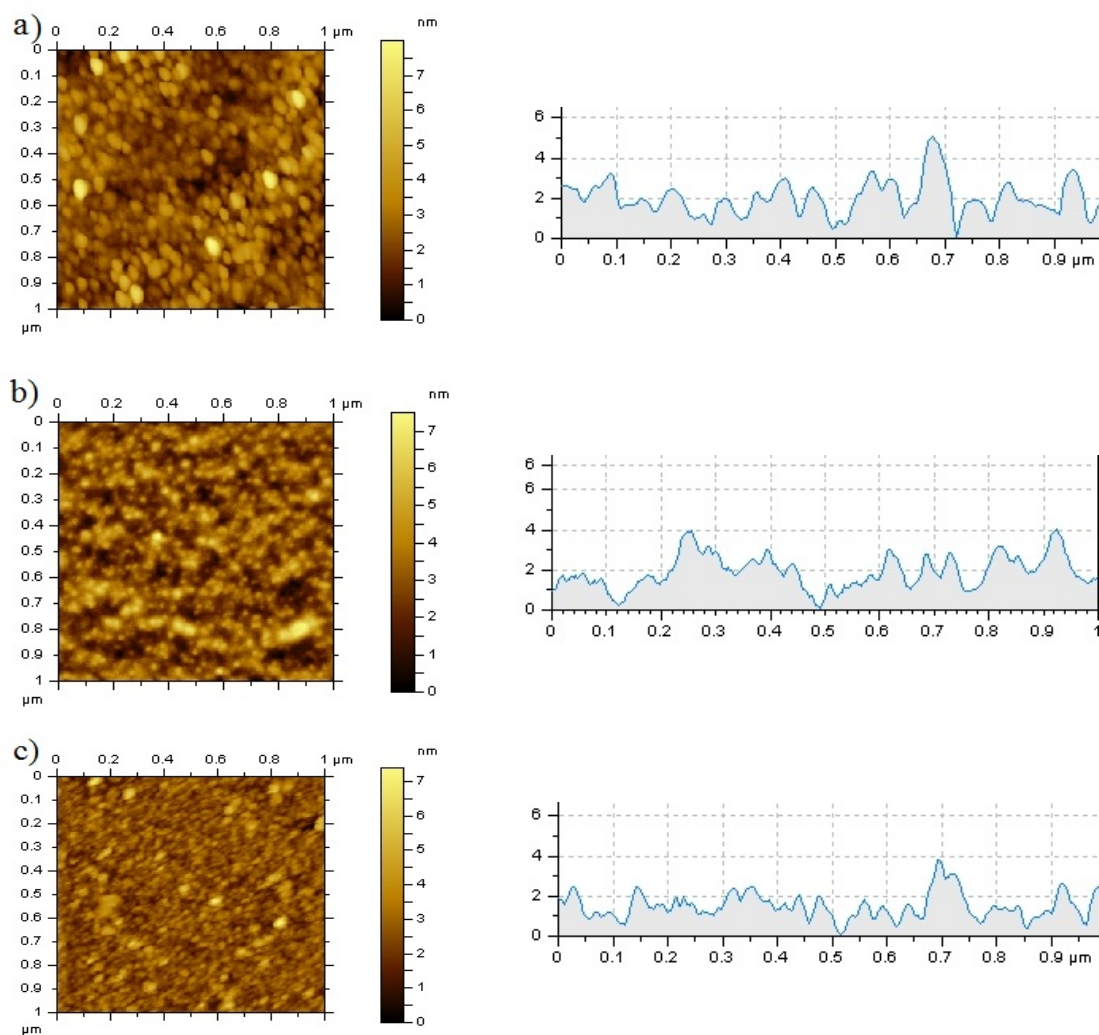

Figure S2 ↓ XRD spectra of (a) Milk-CDs (b) S doped CDs and (c) N doped CDs.

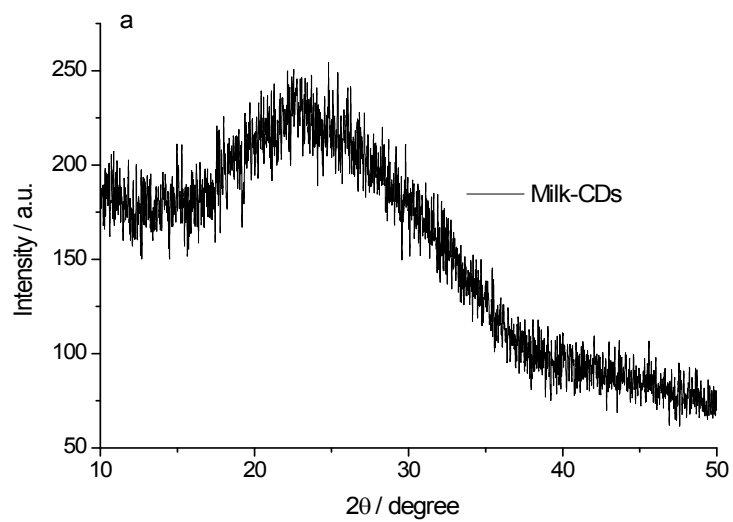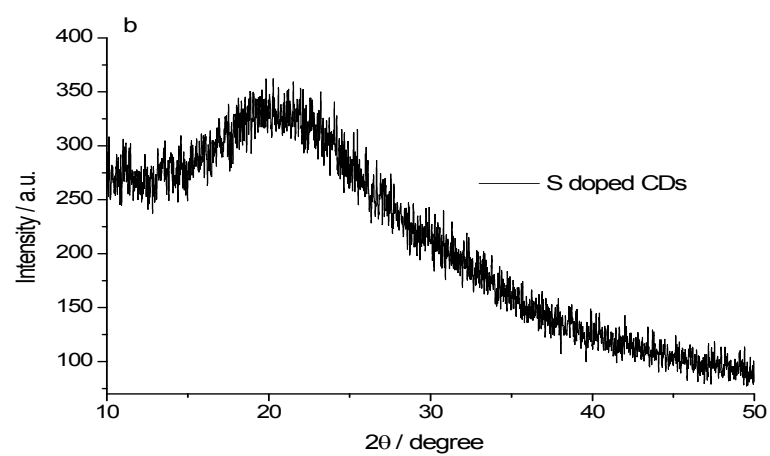

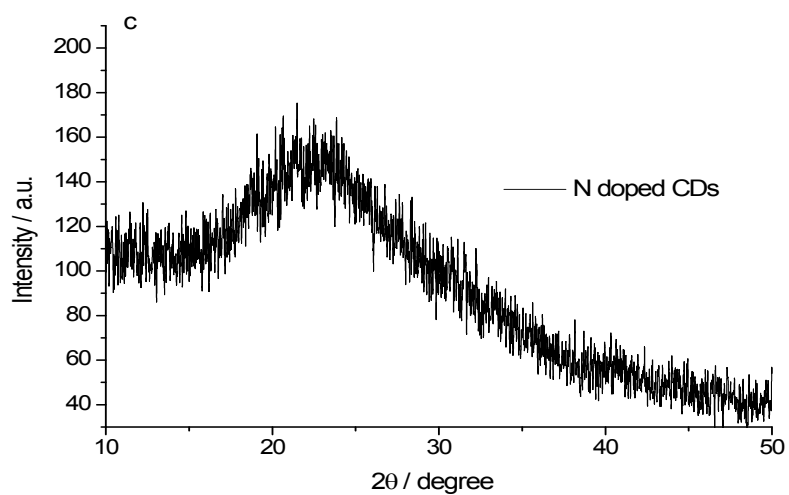

Figure S3 ↓ IR spectrum of Milk-CDs prepared at different times.

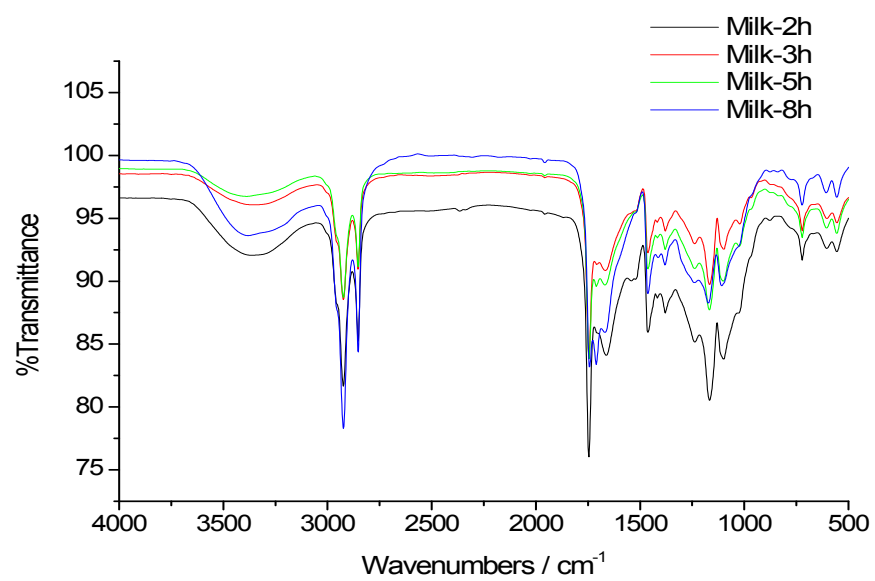

Figure S4 ↓ IR and Raman spectrum of Milk-CDs (8h); S doped CDs; N doped CDs.

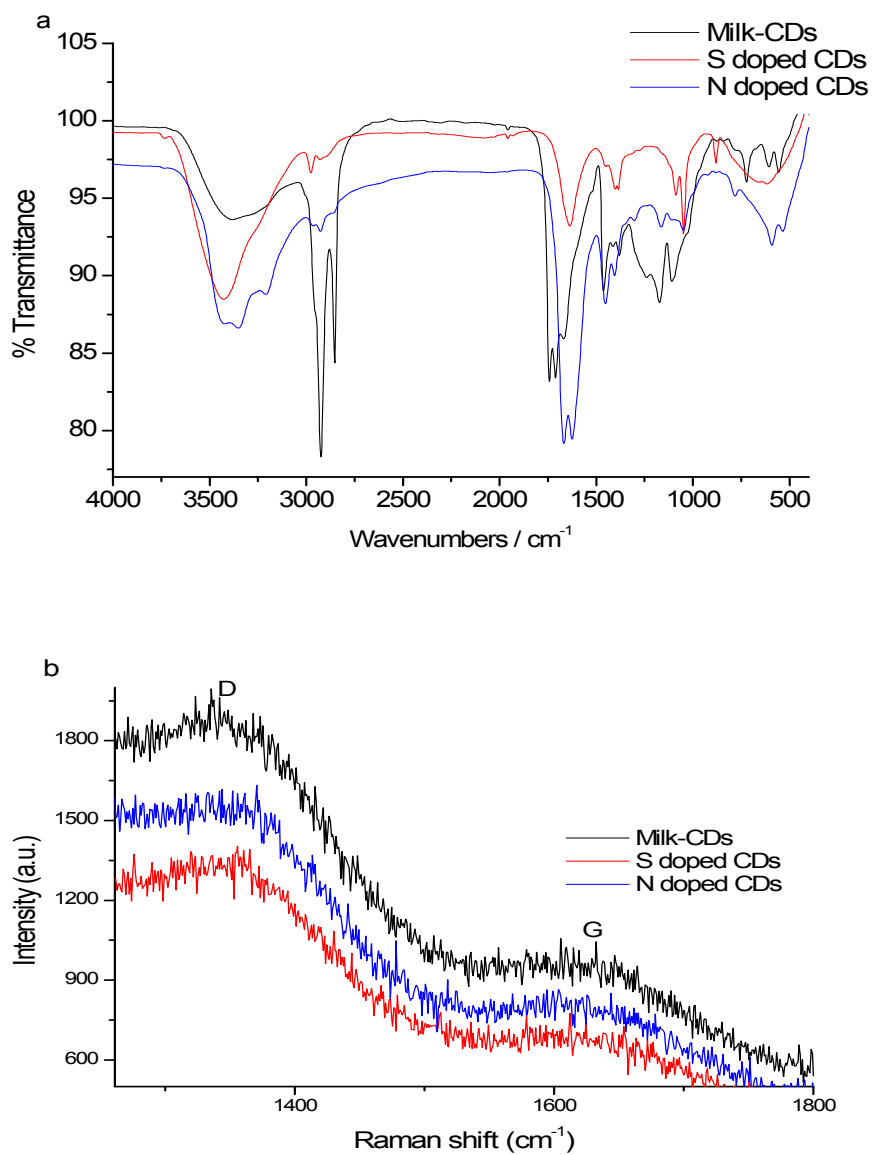

Figure S5 ↓ Normalized absorption spectra of Milk-CDs, S doped CDs, N doped CDs in water.

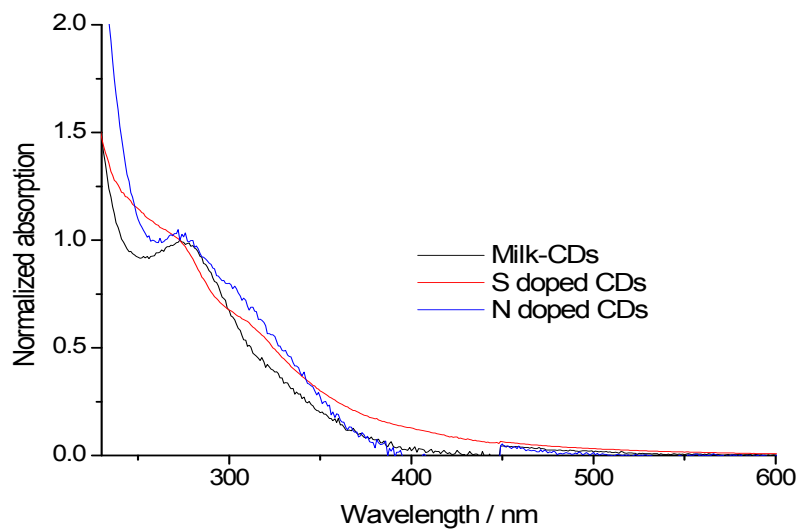

Figure S6 ↓ Fluorescence emission spectra of S doped CDs (a); N doped CDs (b) excitation at different wavelength. The inset shows the optical photos of the S doped CDs and N doped CDs recorded at room light and UV-lamp irradiation

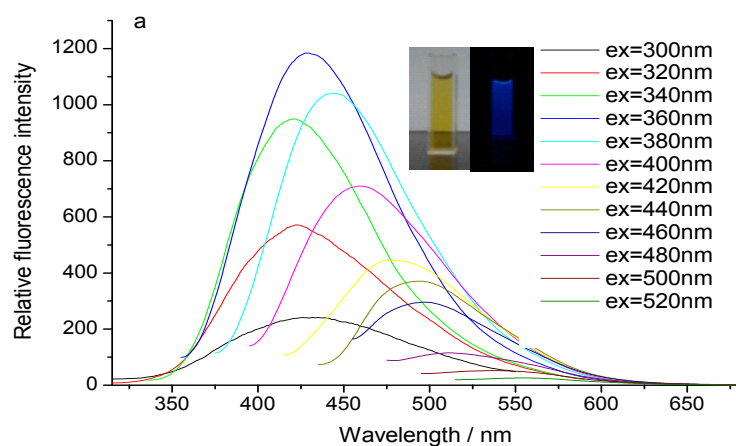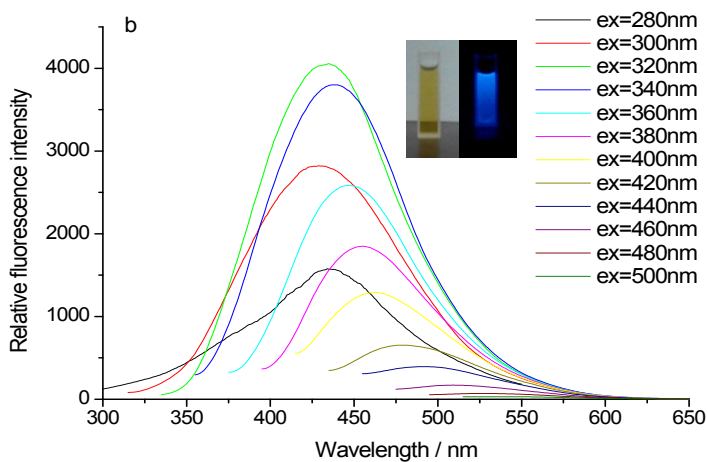

Figure S7 ↓ Fluorescence emission spectra of Milk-CDs (a-2h, b-3h, c-5h) prepared at different times excitation at different wavelength.

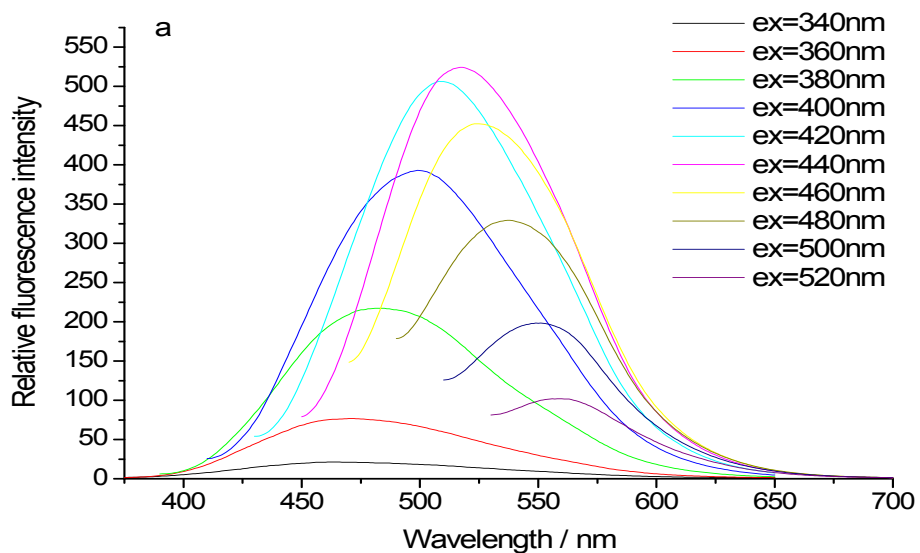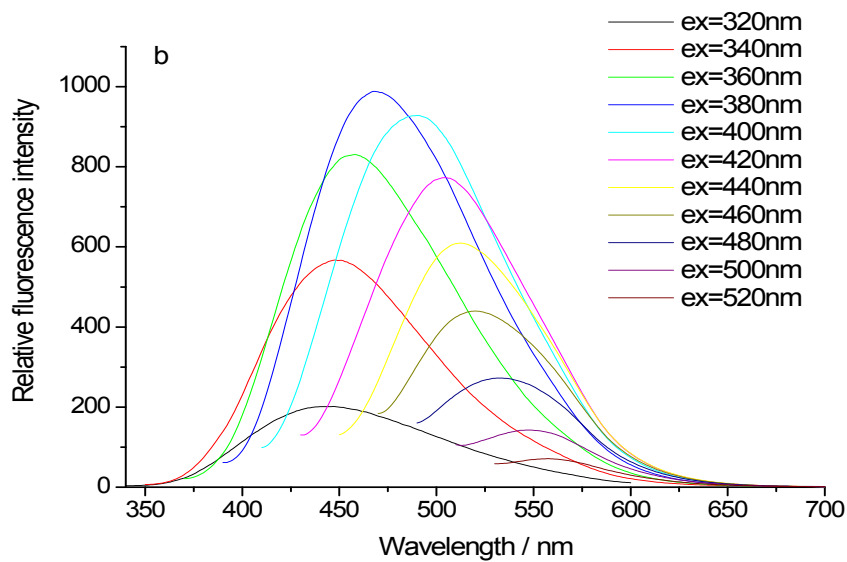



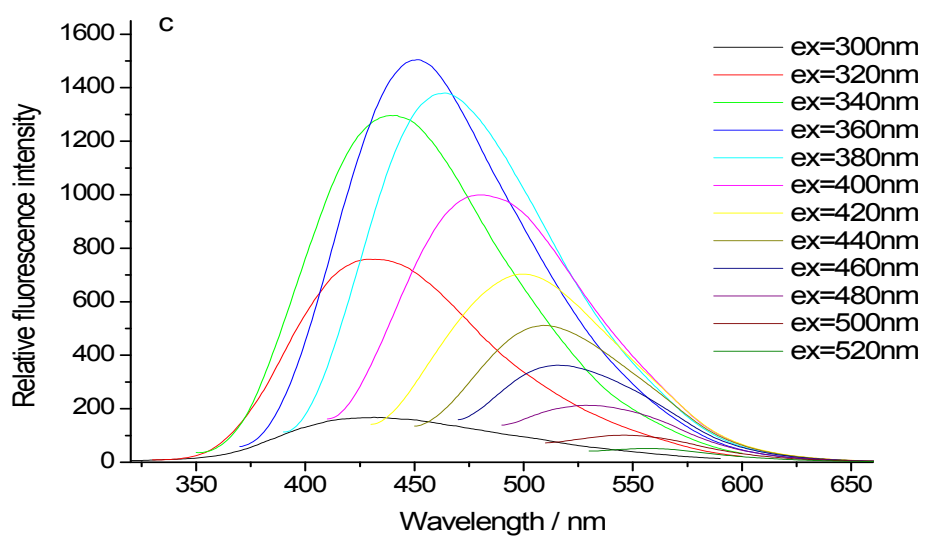

Figure S8 ↓ Up-conversion FL properties of CDs. FL emission spectra for the CDs dispersed in water at excitation wavelengths from 600 nm to 880 nm. (a) S doped CDs; (b) N doped CDs

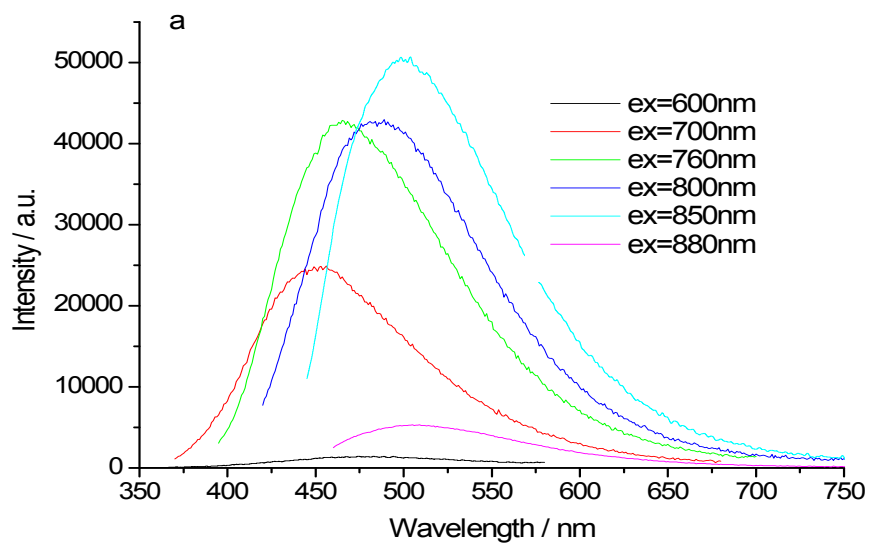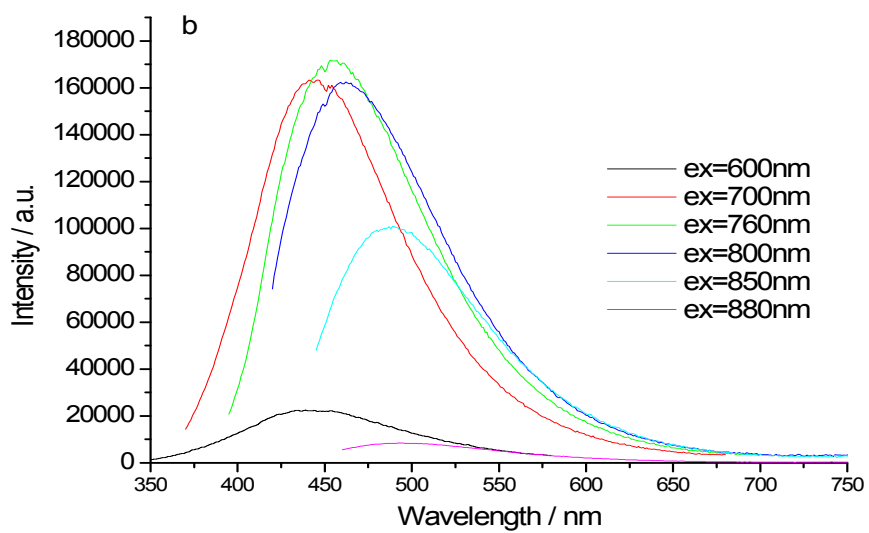

Figure S9 ↓ The decay curves of CDs in water (a) Milk-CDs (2, 3, 5, 8h); (b) Milk-CDs (8h); (c) S doped CDs; (d) N doped CDs; excited at 360 nm.

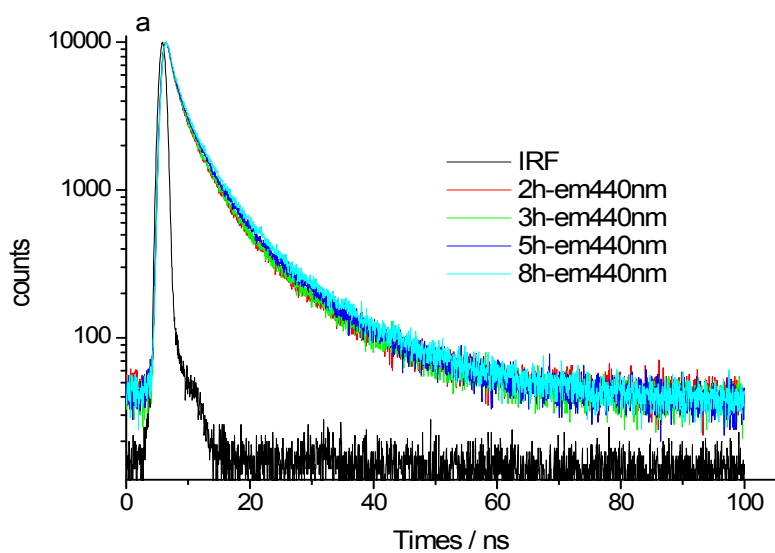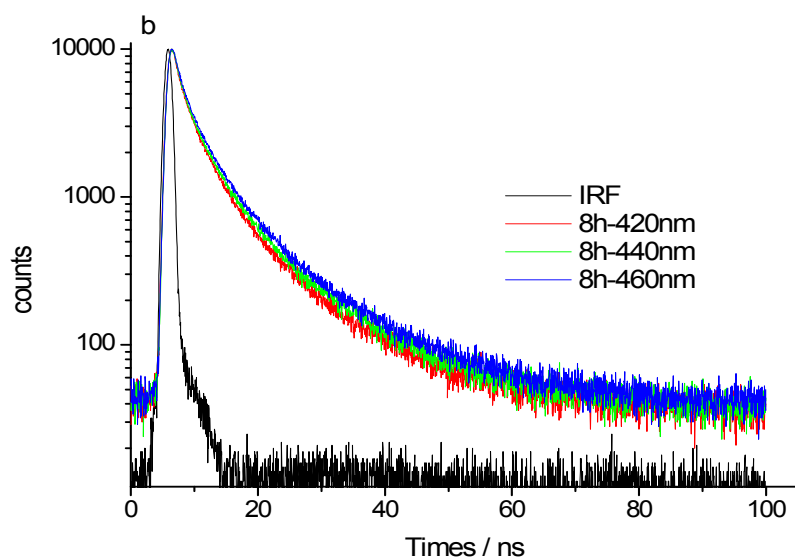

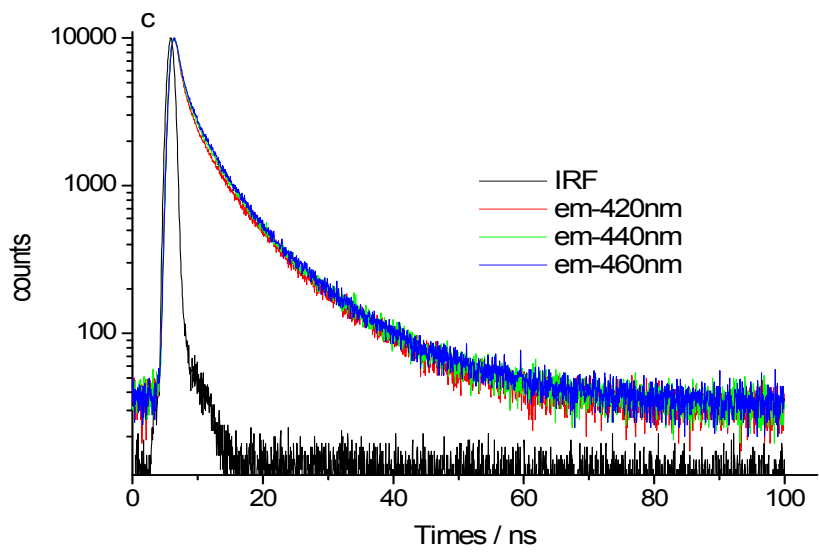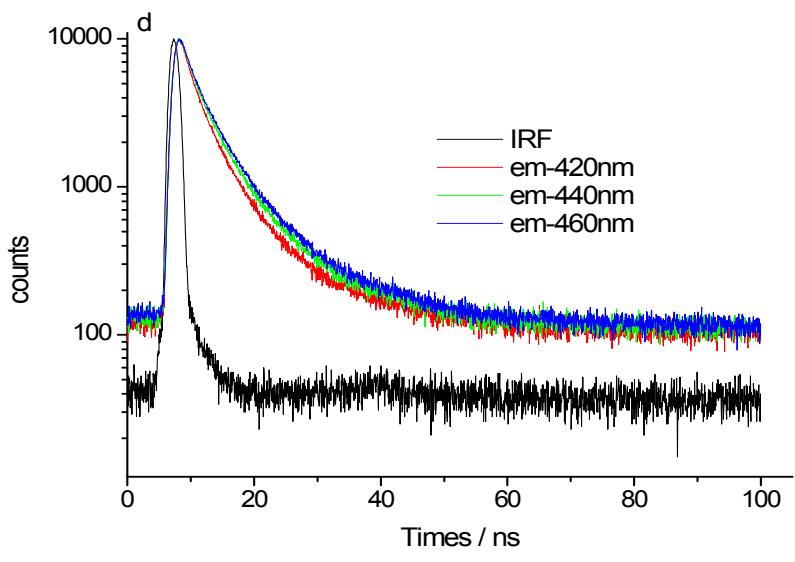

Table S1 ↓ Photophysical Properties of Milk-CDs and Carrots-CDs. The fluorescence quantum yield (FLQY) at different reaction time.

| Sample      | 2h    | 3h    | 5h    | 8h    |
|-------------|-------|-------|-------|-------|
| Milk-CDs    | 5.86% | 6.75% | 7.27% | 7.55% |
| Carrots-CDs | 4.39% | 4.91% | 5.18% | 5.55% |

Table S2 ↓ Elemental analysis of Milk-CDs, S doped CDs and N doped CDs.

| sample      | C (%) | H (%) | O (%) | N (%) | S (%) |
|-------------|-------|-------|-------|-------|-------|
| Milk-CDs    | 62.50 | 8.379 | 24.45 | 3.92  | 0.751 |
| S doped CDs | 46.83 | 8.150 | 29.37 | 8.22  | 7.428 |
| N doped CDs | 33.70 | 7.143 | 37.28 | 20.88 | 1.002 |

Table S3 ↓Photophysical properties of CDs (reaction time-8h). The fluorescence quantum yield (FLQY) at different excitation wavelength.

| Sample      | $\lambda_{\text{ex}}=320\text{nm}$ | $\lambda_{\text{ex}}=340\text{nm}$ | $\lambda_{\text{ex}}=360\text{nm}$ | $\lambda_{\text{ex}}=380\text{nm}$ |
|-------------|------------------------------------|------------------------------------|------------------------------------|------------------------------------|
| Milk-CDs    | 1.85%                              | 9.62%                              | 9.68%                              | 7.07%                              |
| S dopedCDs  | 7.42%                              | 8.82%                              | 10.38%                             | 6.58%                              |
| N doped CDs | 13.52%                             | 15.04%                             | 15.39%                             | 11.52%                             |

Table S4 ↓ Photophysical Properties of Milk-CDs when excitation at 360nm in water. Decay times  $\tau_1$ ,  $\tau_2$ ,  $\tau_3$  and average life time  $\tau_A$ , and the relative amplitude (%).

| Compound | Preparation Time | Monitored Emission Wavelength/nm | $\tau_1$ /ns     | $\tau_2$ /ns     | $\tau_3$ /ns      | $\tau_A$ | $\chi^2$ |
|----------|------------------|----------------------------------|------------------|------------------|-------------------|----------|----------|
| Milk-CDs | 2h               | 420                              | 0.80<br>(22.78%) | 3.26<br>(47.69%) | 10.38<br>(29.53%) | 4.69     | 1.112    |
|          |                  | 440                              | 0.80<br>(20.68%) | 3.28<br>(46.97%) | 10.56<br>(32.34%) | 5.16     | 1.013    |
|          |                  | 460                              | 0.80<br>(19.07%) | 3.38<br>(45.44%) | 10.76<br>(35.50%) | 5.37     | 1.050    |
|          | 3h               | 420                              | 0.72<br>(20.10%) | 3.10<br>(48.74%) | 10.26<br>(31.16%) | 5.05     | 1.042    |
|          |                  | 440                              | 0.81<br>(20.29%) | 3.36<br>(47.50%) | 11.03<br>(32.21%) | 5.43     | 1.079    |
|          |                  | 460                              | 0.85<br>(18.80%) | 3.46<br>(45.74%) | 10.96<br>(35.46%) | 5.49     | 1.043    |
|          | 5h               | 420                              | 0.86<br>(20.37%) | 3.46<br>(49.21%) | 11.17<br>(30.42%) | 5.09     | 1.057    |
|          |                  | 440                              | 0.86<br>(19.22%) | 3.49<br>(47.34%) | 11.27<br>(33.44%) | 5.64     | 1.036    |
|          |                  | 460                              | 0.97<br>(19.30%) | 3.72<br>(45.02%) | 11.46<br>(35.08%) | 6.15     | 1.124    |
|          | 8h               | 420                              | 0.84<br>(17.96%) | 3.42<br>(48.52%) | 11.05<br>(33.53%) | 5.54     | 1.144    |
|          |                  | 440                              | 0.95<br>(19.29%) | 3.75<br>(47.01%) | 11.74<br>(33.70%) | 5.90     | 1.043    |
|          |                  | 460                              | 1.01<br>(18.58%) | 3.92<br>(46.17%) | 12.04<br>(35.25%) | 6.07     | 1.017    |

Photophysical Properties of the Milk-CDs (8h), S doped CDs and N doped CDs when excitation at 360nm in water. Decay times  $\tau_1$ ,  $\tau_2$ ,  $\tau_3$  and average life time  $\tau_A$ , and the relative amplitude (%).

| Compound    | Reaction Time | Monitored Emission Wavelength /nm | $\tau_1$ /ns     | $\tau_2$ /ns     | $\tau_3$ /ns      | $\tau_A$ | $\chi^2$ |
|-------------|---------------|-----------------------------------|------------------|------------------|-------------------|----------|----------|
| Milk-CDs    | 8h            | 420                               | 0.84<br>(17.96%) | 3.42<br>(48.52%) | 11.05<br>(33.53%) | 5.54     | 1.144    |
|             |               | 440                               | 0.95<br>(19.29%) | 3.75<br>(47.01%) | 11.74<br>(33.70%) | 5.90     | 1.043    |
|             |               | 460                               | 1.01<br>(18.58%) | 3.92<br>(46.17%) | 12.04<br>(35.25%) | 6.07     | 1.017    |
| S doped CDs | 8h            | 420                               | 0.64<br>(25.00%) | 3.14<br>(36.63%) | 10.23<br>(38.37%) | 5.07     | 1.022    |
|             |               | 440                               | 0.75<br>(25.09%) | 3.63<br>(39.86%) | 10.87<br>(35.05%) | 5.47     | 1.020    |
|             |               | 460                               | 0.68<br>(21.62%) | 3.47<br>(42.03%) | 10.55<br>(36.35%) | 5.29     | 0.991    |
| N doped CDs | 8h            | 420                               | 1.32<br>(22.12%) | 3.97<br>(56.32%) | 11.54<br>(21.56%) | 5.20     | 1.039    |
|             |               | 440                               | 1.21<br>(15.70%) | 3.84<br>(54.17%) | 10.33<br>(30.14%) | 5.53     | 1.020    |
|             |               | 460                               | 1.22<br>(14.00%) | 4.08<br>(55.12%) | 10.78<br>(30.88%) | 5.85     | 1.014    |

Table S5 ↓ Photophysical Properties of CDs when excitation at 330 nm in water. Decay times  $\tau_1$ ,  $\tau_2$ ,  $\tau_3$  and average life time  $\tau_A$ , and the relative



amplitude (%)

| Compound    | Excitation Wavelength/nm | Monitored Emission Wavelength /nm | $\tau_1$ /ns     | $\tau_2$ /ns     | $\tau_3$ /ns      | $\tau_A$ | $\chi^2$ |
|-------------|--------------------------|-----------------------------------|------------------|------------------|-------------------|----------|----------|
| Milk-CDs    | 330                      | 420                               | 0.84<br>(11.72%) | 3.82<br>(31.42%) | 10.87<br>(56.86%) | 7.38     | 1.028    |
|             |                          | 440                               | 1.19<br>(15.70%) | 4.87<br>(35.54%) | 11.93<br>(48.76%) | 7.63     | 1.012    |
|             |                          | 460                               | 1.06<br>(13.40%) | 4.45<br>(37.01%) | 12.00<br>(49.59%) | 7.88     | 1.014    |
| S doped CDs | 330                      | 420                               | 0.78<br>(26.60%) | 3.47<br>(34.65%) | 10.03<br>(38.75%) | 5.32     | 1.032    |
|             |                          | 440                               | 0.77<br>(23.69%) | 3.52<br>(36.90%) | 10.45<br>(39.41%) | 5.59     | 1.083    |
|             |                          | 460                               | 0.83<br>(23.62%) | 3.77<br>(39.16%) | 10.75<br>(37.22%) | 5.79     | 1.107    |
| N doped CDs | 330                      | 420                               | 1.08<br>(13.15%) | 3.59<br>(44.51%) | 9.84<br>(42.34%)  | 5.99     | 1.044    |
|             |                          | 440                               | 1.23<br>(11.18%) | 3.97<br>(40.57%) | 10.06<br>(48.25%) | 6.51     | 1.067    |
|             |                          | 460                               | 1.51<br>(12.50%) | 4.63<br>(40.91%) | 10.34<br>(46.59%) | 6.87     | 1.003    |

Photophysical Properties of CDs when excitation at 375 nm in water.

Decay times  $\tau_1$ ,  $\tau_2$ ,  $\tau_3$  and average life time  $\tau_A$ , and the relative amplitude

(%)

| Compound    | Excitation Wavelength/nm | Monitored Emission Wavelength /nm | $\tau_1$ /ns     | $\tau_2$ /ns     | $\tau_3$ /ns      | $\tau_A$ | $\chi^2$ |
|-------------|--------------------------|-----------------------------------|------------------|------------------|-------------------|----------|----------|
| Milk-CDs    | 375                      | 420                               | 0.33<br>(19.80%) | 3.31<br>(41.77%) | 12.41<br>(38.43%) | 6.22     | 1.157    |
|             |                          | 440                               | 0.36<br>(17.91%) | 3.52<br>(42.00%) | 13.06<br>(40.09%) | 7.05     | 1.064    |
|             |                          | 460                               | 0.38<br>(15.84%) | 3.51<br>(40.57%) | 12.58<br>(43.59%) | 6.78     | 1.042    |
| S doped CDs | 375                      | 420                               | 0.30<br>(23.49%) | 3.23<br>(35.49%) | 10.53<br>(41.02%) | 5.67     | 1.057    |
|             |                          | 440                               | 0.28<br>(22.82%) | 3.30<br>(38.84%) | 10.59<br>(38.34%) | 5.55     | 1.014    |
|             |                          | 460                               | 0.39<br>(22.00%) | 3.63<br>(45.02%) | 11.45<br>(32.98%) | 5.65     | 1.092    |
| N doped CDs | 375                      | 420                               | 0.48<br>(17.13%) | 3.04<br>(55.06%) | 9.32<br>(27.63%)  | 4.42     | 1.117    |
|             |                          | 440                               | 0.52<br>(15.95%) | 3.37<br>(55.14%) | 10.36<br>(28.91%) | 5.02     | 1.121    |
|             |                          | 460                               | 0.43<br>(13.53%) | 3.32<br>(49.91%) | 9.74<br>(36.56%)  | 5.42     | 1.075    |

Table S6 ↓ Photophysical Properties of Carrot-CDs when excitation at 360nm in water. Decay times  $\tau_1$ ,  $\tau_2$  and  $\tau_3$ , and the relative amplitude (%)

| Compound   | Preparation Time | Monitored Emission Wavelength/nm | $\tau_1$ /ns     | $\tau_2$ /ns     | $\tau_3$ /ns      |
|------------|------------------|----------------------------------|------------------|------------------|-------------------|
| Carrot-CDs | 2h               | 420                              | 0.70<br>(28.09%) | 2.77<br>(55.12%) | 9.71<br>(16.79%)  |
|            |                  | 440                              | 0.72<br>(25.29%) | 2.77<br>(53.63%) | 9.52<br>(21.08%)  |
|            |                  | 460                              | 0.76<br>(24.30%) | 3.06<br>(52.18%) | 10.19<br>(23.52%) |
|            | 3h               | 420                              | 0.68<br>(30.14%) | 2.72<br>(54.22%) | 9.35<br>(15.64%)  |
|            |                  | 440                              | 0.75<br>(30.17%) | 2.90<br>(52.02%) | 9.75<br>(17.81%)  |
|            |                  | 460                              | 0.74<br>(26.07%) | 2.95<br>(50.92%) | 9.31<br>(23.01%)  |
|            | 5h               | 420                              | 0.72<br>(31.29%) | 2.61<br>(53.68%) | 8.82<br>(15.03%)  |
|            |                  | 440                              | 0.77<br>(30.88%) | 2.72<br>(51.42%) | 9.06<br>(17.71%)  |
|            |                  | 460                              | 0.82<br>(29.04%) | 3.01<br>(50.99%) | 9.70<br>(19.97%)  |
|            | 8h               | 420                              | 0.75<br>(31.15%) | 2.61<br>(53.39%) | 9.07<br>(15.46%)  |
|            |                  | 440                              | 0.80<br>(31.24%) | 2.84<br>(52.12%) | 10.04<br>(16.65%) |
|            |                  | 460                              | 0.87<br>(29.68%) | 3.11<br>(49.96%) | 10.44<br>(20.37%) |
